# Supplementary material
Source: PubMed Central journal article supplement (PMC3193358)
Supplement: 10.3163.1536-5050.99.4.012.sg001.pdf [file 10.3163.1536-5050.99.4.012.sg001.pdf]

## **Long-term outcomes of the ¡VIVA! Peer Tutor Project: use of MedlinePlus by former peer tutors and the adults they taught**

**Cynthia Olney, PhD; Lucille Hansen, MLIS, MA; Ann Vickman, MLIS; Sara Reibman, MLIS; Frederick B. Wood, MBA, DBA; Elliot Siegel, PhD**

### **APPENDIX A**

#### **The ¡VIVA! peer tutor questionnaire: peer tutor alumni version**

1. Use of online resources

1. Please indicate if you have used MedlinePlus and/or Medlineplus en español in the last six months. Please check both if you have used both. Please check “neither” if you have not used these resources in the last six months. If you aren’t sure, check “don’t know.”

- MedlinePlus
- MedlinePlus en español
- Neither
- Don’t know

2. How often do you use MedlinePlus or MedlinePlus en español?

- Once a week or more
- 1–2 times a month
- 3–4 times a year
- 1–2 times a year
- Almost never or never
- Don’t know

3. Do other people in your family use the following online consumer health products?

|                        | Yes                   | No                    | Don’t know/Not sure   |
|------------------------|-----------------------|-----------------------|-----------------------|
| MedlinePlus            | <input type="radio"/> | <input type="radio"/> | <input type="radio"/> |
| MedlinePlus en español | <input type="radio"/> | <input type="radio"/> | <input type="radio"/> |

If you marked yes, please list which family members use either of the websites \_\_\_\_\_

4. Have you told others about or shown others MedlinePlus or MedlinePlus en español within the last six months?

- Yes
- No
- Don’t know

5. Do you have a success story you would like to share about using MedlinePlus to help you or someone you know with a health issue? \_\_\_\_\_

6. How did your experience as a peer tutor prepare you for life after high school? Please indicate if your experience as a peer tutor increased your skills in the following areas.

|                                                                | Yes                   | No                    | Not sure/don't know   |
|----------------------------------------------------------------|-----------------------|-----------------------|-----------------------|
| Finding health information for myself                          | <input type="radio"/> | <input type="radio"/> | <input type="radio"/> |
| Helping others find health information when they need it       | <input type="radio"/> | <input type="radio"/> | <input type="radio"/> |
| Speaking publicly                                              | <input type="radio"/> | <input type="radio"/> | <input type="radio"/> |
| Communicating interpersonally                                  | <input type="radio"/> | <input type="radio"/> | <input type="radio"/> |
| Listening to and understanding others                          | <input type="radio"/> | <input type="radio"/> | <input type="radio"/> |
| Working in teams                                               | <input type="radio"/> | <input type="radio"/> | <input type="radio"/> |
| Managing projects (planning projects, meeting deadlines, etc.) | <input type="radio"/> | <input type="radio"/> | <input type="radio"/> |
| Using library resources for research                           | <input type="radio"/> | <input type="radio"/> | <input type="radio"/> |
| Participating in community service                             | <input type="radio"/> | <input type="radio"/> | <input type="radio"/> |
| Using technology (like software, PDAs, etc.)                   | <input type="radio"/> | <input type="radio"/> | <input type="radio"/> |
| Appreciating and respecting many different types of people     | <input type="radio"/> | <input type="radio"/> | <input type="radio"/> |
| Writing clearly                                                | <input type="radio"/> | <input type="radio"/> | <input type="radio"/> |

7. Tell us how your experience as a peer tutor affected any decisions you made after graduation, such as choices about your major, jobs or volunteer projects you pursued, decisions about internships, etc.

---

8. When (what years) were you a peer tutor? (Please give the actual years, like 2003, not your academic years, like "junior year.")

---

9. How many peer tutor Summer Institutes did you attend while you were in high school (including the summer after your senior year)?

- None
- One
- Two
- Three
- Four or more
