# Supplementary material
Source: PubMed Central journal article supplement (PMC3193358)
Supplement: 10.3163.1536-5050.99.4.012.sg002.pdf [file 10.3163.1536-5050.99.4.012.sg002.pdf]

**Long-term outcomes of the ¡VIVA! Peer Tutor Project: use of MedlinePlus by former peer tutors and the adults they taught**

**Cynthia Olney, PhD; Lucille Hansen, MLIS, MA; Ann Vickman, MLIS; Sara Reibman, MLIS; Frederick B. Wood, MBA, DBA; Elliot Siegel, PhD**

**APPENDIX B**

**The ¡VIVA! peer tutor questionnaire: faculty and administrator version**

1. Use of online resources

1. Please indicate if you have used MedlinePlus and/or Medlineplus en español in the last six months. Please check both if you have used both. Please check “neither” if you have not used these resources in the last six months. If you aren’t sure, check “don’t know.”

- MedlinePlus
- MedlinePlus en español
- Neither
- Don’t know

2. How often do you use MedlinePlus or MedlinePlus en español?

- Once a week or more
- 1–2 times a month
- 3–4 times a year
- 1–2 times a year
- Almost never or never
- Don’t know

3. Do other people in your family use the following online consumer health products?

|                        | Yes                   | No                    | Don’t know/Not sure   |
|------------------------|-----------------------|-----------------------|-----------------------|
| MedlinePlus            | <input type="radio"/> | <input type="radio"/> | <input type="radio"/> |
| MedlinePlus en español | <input type="radio"/> | <input type="radio"/> | <input type="radio"/> |

If you marked yes, please list which family members use either of the websites \_\_\_\_\_

4. Have you told others about or shown others MedlinePlus or MedlinePlus en español within the last six months?

- Yes
- No
- Don’t know

5. Do you have a success story you would like to share about using MedlinePlus to help you or someone you know with a health issue? \_\_\_\_\_

6. Which of the following best describes you? (Check all that apply)

- High school teacher (health, science, and technology [HST])
- High school teacher (non-HST)
- School administrator
- Health professional
- Community-based organization staff
- Other

Other (please specify) \_\_\_\_\_
