# Supplementary material
Source: PubMed Central journal article supplement (PMC3193358)
Supplement: 10.3163.1536-5050.99.4.012.sg003.pdf [file 10.3163.1536-5050.99.4.012.sg003.pdf]

**Long-term outcomes of the ¡VIVA! Peer Tutor Project: use of MedlinePlus by former peer tutors and the adults they taught**

**Cynthia Olney, PhD; Lucille Hansen, MLIS, MA; Ann Vickman, MLIS; Sara Reibman, MLIS; Frederick B. Wood, MBA, DBA; Elliot Siegel, PhD**

**Table 2**  
The ¡VIVA! peer tutor experience and lifelong learning skills (n=30)

| <b>Question: Please indicate if your experience as a peer tutor increased your skills in the following areas</b> |    | <b>Yes</b> |   | <b>No</b> |   | <b>Not sure</b> |
|------------------------------------------------------------------------------------------------------------------|----|------------|---|-----------|---|-----------------|
| Finding health information for myself                                                                            | 29 | (97%)*     | 1 | (3%)      | 0 | (—)             |
| Helping others find health information when they need it                                                         | 29 | (97%)      | 1 | (3%)      | 0 | (—)             |
| Managing projects (planning projects, meeting deadlines, etc.)                                                   | 29 | (97%)      | 0 | (—)       | 1 | (3%)            |
| Using library resources for research                                                                             | 29 | (97%)      | 0 | (—)       | 1 | (3%)            |
| Listening to and understanding others                                                                            | 28 | (93%)      | 1 | (3%)      | 1 | (3%)            |
| Working in teams                                                                                                 | 27 | (90%)      | 1 | (3%)      | 2 | (7%)            |
| Participating in community service                                                                               | 27 | (90%)      | 1 | (3%)      | 2 | (7%)            |
| Appreciating and respecting many different types of people                                                       | 27 | (90%)      | 2 | (7%)      | 1 | (3%)            |
| Speaking publicly                                                                                                | 25 | (83%)      | 3 | (10%)     | 2 | (7%)            |
| Communicating interpersonally                                                                                    | 25 | (83%)      | 3 | (10%)     | 2 | (7%)            |
| Using technology (like software, PDAs, etc.)                                                                     | 24 | (80%)      | 2 | (7%)      | 4 | (13%)           |
| Writing clearly                                                                                                  | 18 | (60%)      | 9 | (30%)     | 3 | (10%)           |

\* Percentages should be interpreted with caution due to the low number of respondents
